# Supplementary material for: Impact of Total Quality Management on Healthcare Service Quality in Yemeni Hospitals: A Cross-Sectional Study
Source: Research Square preprint supplement (doi:10.21203/rs.3.rs-7115768/v1), 2025-08-19
Supplement: Supplementary file 1 [file 4b8dcd5f60d3184ee1fb8d5b.docx]

**Appendix A: Study Questionnaire**

**Title of the Study: The Impact of Total Quality Management (TQM) on Improving Healthcare Service Quality in Yemeni Hospitals.**

**Researcher:** Jibran Mohammed Al-Salit

**Contact:** [Jobran777@yahoo.com](https://www.google.com/url?sa=E&q=mailto%3AJobran777%40yahoo.com)

**Introduction and Consent**

Dear Healthcare Professional,

Greetings. This questionnaire is part of a PhD research study in Hospital Administration. The study aims to investigate the impact of Total Quality Management (TQM) implementation on improving healthcare service quality within Yemeni hospitals, from the perspective of hospital employees.

Your participation is highly valuable and will contribute significantly to understanding the current state of quality management in our healthcare system. Your responses will be treated with the strictest confidentiality and will be used solely for the purposes of scientific research.

Please answer the following questions by placing a checkmark (✓) in the appropriate box that best reflects your opinion.

Thank you for your time and valuable contribution.

Sincerely,
Jibran Mohammed Al-Salit

# **Section 1: Demographic Information**

*Please fill in the box that corresponds to your information.*

**1. Gender:**

- ☐ Male
- ☐ Female

**2. Highest Educational Qualification:**

- ☐ High School
- ☐ Diploma
- ☐ Bachelor's Degree
- ☐ Master's Degree
- ☐ PhD / Board Certification

**3. Years of Experience:**

- ☐ Less than 5 years
- ☐ 5 - 10 years
- ☐ More than 10 years

**4. Specialization:**

- ☐ Administrative
- ☐ Physician
- ☐ Nurse
- ☐ Technician
- ☐ Other (Please specify): _______________

**5. Job Title:**

- ☐ Specialist Staff
- ☐ Supervisor
- ☐ Head of Department / Deputy
- ☐ Head of Administration / Deputy
- ☐ General Manager / Deputy

# **Section 2: Measurement of Study Variables**

*Please indicate your level of agreement with the following statements by placing a checkmark (✓) in the column that best represents your view. The scale ranges from "Strongly Disagree" to "Strongly Agree".*

## **Part 1: Independent Variable - Total Quality Management (TQM) Implementation**

| No. | **A. Leadership & Management Commitment** | Strongly Disagree | | Disagree | | Slightly Disagree | | Neutral | | Slightly Agree | Agree | Strongly Agree |
| --- | --- | --- | --- | --- | --- | --- | --- | --- | --- | --- | --- | --- |
| 1. | Topics related to healthcare quality are consistently on the agenda of senior management meetings. |  | |  | |  | |  | |  |  |  |
| 2. | Hospital leadership regularly reviews monthly reports on administrative and technical performance indicators. |  | |  | |  | |  | |  |  |  |
| 3. | The hospital administration provides the necessary resources to implement TQM activities. |  | |  | |  | |  | |  |  |  |
| 4. | The hospital has a dedicated department for managing the implementation of the TQM system. |  | |  | |  | |  | |  |  |  |
| 5. | The TQM department is managed by a qualified director with sufficient knowledge and experience in quality. |  | |  | |  | |  | |  |  |  |
| 6. | The administration delegates sufficient authority to the quality director to execute TQM responsibilities. |  | |  | |  | |  | |  |  |  |
| 7. | Administrative and technical leaders actively participate in quality councils, committees, and teams. |  | |  | |  | |  | |  |  |  |
| No. | **B. Human Resources (Training, Qualification, Experience)** | Strongly Disagree | Disagree | | Slightly Disagree | | Neutral | | Slightly Agree | | Agree | Strongly Agree |
| 8. | The hospital has a clear plan for the continuous training and education of its employees. |  |  | |  | |  | |  | |  |  |
| 9. | The hospital administration is committed to implementing the training and education plan for all staff. |  |  | |  | |  | |  | |  |  |
| 10. | The training plan covers all technical and administrative aspects of work within the hospital. |  |  | |  | |  | |  | |  |  |
| 11. | The administration provides all requirements for training (e.g., trainers, budget, tools, educational materials). |  |  | |  | |  | |  | |  |  |
| 12. | Members of quality teams and committees have the expertise to use tools for data collection and analysis. |  |  | |  | |  | |  | |  |  |
| 13. | The administration identifies training needs based on quality monitoring results and performance evaluations. |  |  | |  | |  | |  | |  |  |
| 14. | The hospital provides equal opportunities for all employees in training and professional development. |  |  | |  | |  | |  | |  |  |

| No. | **C. Policy & Strategy** | Strongly Disagree | Disagree | Slightly Disagree | Neutral | Slightly Agree | Agree | Strongly Agree |
| --- | --- | --- | --- | --- | --- | --- | --- | --- |
| 15. | A formal strategic plan exists for the hospital. |  |  |  |  |  |  |  |
| 16. | The quality strategy is an integral part of the hospital's overall strategy. |  |  |  |  |  |  |  |
| 17. | The hospital's strategy includes a clear vision and mission statement. |  |  |  |  |  |  |  |
| 18. | The strategy includes clear and achievable strategic objectives. |  |  |  |  |  |  |  |
| 19. | The operational plan is time-bound and clearly defines activities and responsible parties. |  |  |  |  |  |  |  |
| 20. | The implementation of the operational plan is regularly monitored and evaluated. |  |  |  |  |  |  |  |
| 21. | The quality management structure is clearly defined and covers all administrative levels. |  |  |  |  |  |  |  |
| 22. | The TQM objectives cover at least the following areas: patient safety, clinical effectiveness, and patient experience. |  |  |  |  |  |  |  |
| 23. | The hospital has a clear program for improving the quality and safety of patients. |  |  |  |  |  |  |  |
| 24. | The hospital has a clear mechanism for assessing technical and administrative risks. |  |  |  |  |  |  |  |
| 25. | The hospital has a clear mechanism for assessing the quality of health services provided to patients. |  |  |  |  |  |  |  |
| 26. | Quality teams and committees are formed based on criteria of personal traits, knowledge, and skills. |  |  |  |  |  |  |  |
| 27. | Patients, providers, and community stakeholders are involved in setting the hospital's quality strategy. |  |  |  |  |  |  |  |
| No. | **D. Partnerships & Resources** | Strongly Disagree | Disagree | Slightly Disagree | Neutral | Slightly Agree | Agree | Strongly Agree |
| 28. | The hospital uses an electronic system at various points of service delivery. |  |  |  |  |  |  |  |
| 29. | The hospital applies global design standards to ensure effective communication with service providers. |  |  |  |  |  |  |  |
| 30. | The administration adheres to quality standards in providing medical equipment used in service delivery. |  |  |  |  |  |  |  |
| 31. | The hospital has sufficient funding mechanisms and resources to cover all operational expenses. |  |  |  |  |  |  |  |
| 32. | The administration provides furniture and equipment in accordance with global healthcare quality standards. |  |  |  |  |  |  |  |

| No. | **E. Processes (Measurement, Analysis, and Evaluation)** | Strongly Disagree | Disagree | Slightly Disagree | Neutral | Slightly Agree | Agree | Strongly Agree |
| --- | --- | --- | --- | --- | --- | --- | --- | --- |
| 33. | Staff adhere to quality principles, standards, and procedures when providing health services. |  |  |  |  |  |  |  |
| 34. | The hospital uses clinical audits and reviews to improve quality. |  |  |  |  |  |  |  |
| 35. | The hospital uses clinical service accreditation plans to improve quality. |  |  |  |  |  |  |  |
| 36. | The hospital uses national quality programs to drive improvement. |  |  |  |  |  |  |  |
| 37. | The hospital utilizes results from its annual quality assessment to improve health services. |  |  |  |  |  |  |  |
| 38. | The hospital collects and analyzes performance indicators and uses the findings to improve quality. |  |  |  |  |  |  |  |
| 39. | All staff are involved in risk management, and the hospital uses the analysis for improvement. |  |  |  |  |  |  |  |
| 40. | The hospital uses root cause analysis to investigate the causes of medical errors. |  |  |  |  |  |  |  |
| 41. | The hospital encourages staff to report adverse events. |  |  |  |  |  |  |  |
| 42. | The hospital conducts self-assessments of its service quality according to established standards. |  |  |  |  |  |  |  |
| 43. | Patients are involved in quality improvement activities. |  |  |  |  |  |  |  |
| 44. | The hospital tracks the impact of quality improvement on key performance indicators (e.g., mortality rates, recovery rates, etc.). |  |  |  |  |  |  |  |
| 45. | Performance data is collected from diverse sources (e.g., statistical records, medical files, surveys). |  |  |  |  |  |  |  |
| 46. | Critical performance data is provided immediately and on demand. |  |  |  |  |  |  |  |
| 47. | The information system maintains confidentiality, privacy, and humanity when presenting data. |  |  |  |  |  |  |  |

## **Part 2: Dependent Variable - Health Service Quality**

| No. | **A. Tangibility (Physical Facilities, Equipment, Appearance)** | Strongly Disagree | Disagree | Slightly Disagree | Neutral | Slightly Agree | Agree | Strongly Agree |
| --- | --- | --- | --- | --- | --- | --- | --- | --- |
| 48. | The hospital provides its services using modern medical equipment and technology. |  |  |  |  |  |  |  |
| 49. | The hospital staff appear clean and have a professional appearance. |  |  |  |  |  |  |  |
| 50. | The hospital's general appearance is appropriate for the nature of the services provided. |  |  |  |  |  |  |  |
| 51. | The hospital provides sufficient informational and directional signs for its services. |  |  |  |  |  |  |  |
| 52. | The hospital provides comfortable and highly clean restrooms. |  |  |  |  |  |  |  |
| 53. | The hospital provides comfortable and convenient hospitality services for patients. |  |  |  |  |  |  |  |
| 54. | The technical and engineering specifications of the hospital departments are appropriate for the services offered. |  |  |  |  |  |  |  |
| No. | **B. Reliability (Efficiency, Effectiveness, Appropriateness)** | Strongly Disagree | Disagree | Slightly Disagree | Neutral | Slightly Agree | Agree | Strongly Agree |
| 55. | The hospital administration fulfills its promises to patients as much as possible. |  |  |  |  |  |  |  |
| 56. | Patients are satisfied with the quality of services provided by the hospital. |  |  |  |  |  |  |  |
| 57. | The administration is concerned with and empathetic to patients' problems. |  |  |  |  |  |  |  |
| 58. | The administration is keen to provide the service correctly the first time. |  |  |  |  |  |  |  |
| 59. | The administration maintains accurate and well-documented medical records. |  |  |  |  |  |  |  |
| 60. | The hospital has the trust of its beneficiaries for its health services. |  |  |  |  |  |  |  |
| 61. | The hospital provides safe and error-free health services. |  |  |  |  |  |  |  |

| No. | **C. Empathy (Relationships, Choice)** | Strongly Disagree | Disagree | Slightly Disagree | Neutral | Slightly Agree | Agree | Strongly Agree |
| --- | --- | --- | --- | --- | --- | --- | --- | --- |
| 62. | Staff provide appropriate and correct answers to patients' questions and inquiries. |  |  |  |  |  |  |  |
| 63. | The behavior of the staff instills confidence in patients. |  |  |  |  |  |  |  |
| 64. | Beneficiaries feel safe in their interactions with hospital staff. |  |  |  |  |  |  |  |
| No. | **D. Responsiveness (Continuity, Accessibility, Timeliness)** | Strongly Disagree | Disagree | Slightly Disagree | Neutral | Slightly Agree | Agree | Strongly Agree |
| 65. | Physicians discuss the details and procedures of the service with their patients. |  |  |  |  |  |  |  |
| 66. | The hospital provides all services a patient needs correctly, the first time and every time. |  |  |  |  |  |  |  |
| 67. | Patients receive health services at the hospital without delay. |  |  |  |  |  |  |  |
| 68. | The staff are always willing to provide assistance to patients. |  |  |  |  |  |  |  |
| 69. | The hospital provides health services around the clock. |  |  |  |  |  |  |  |

| No. | **E. Assurance (Technical Capability, Safety)** | Strongly Disagree | Disagree | Slightly Disagree | Neutral | Slightly Agree | Agree | Strongly Agree |
| --- | --- | --- | --- | --- | --- | --- | --- | --- |
| 70. | The hospital places the patient's best interest at the core of its focus. |  |  |  |  |  |  |  |
| 71. | The hospital supports the needs of its staff to perform their duties optimally (e.g., childcare). |  |  |  |  |  |  |  |
| 72. | The hospital maintains electronic records and documents for patients. |  |  |  |  |  |  |  |
| 73. | The hospital has a good reputation and standing within the community. |  |  |  |  |  |  |  |
| 74. | The behavior of the staff is characterized by professional ethics and good conduct with patients. |  |  |  |  |  |  |  |
| 75. | The hospital gives appropriate attention to every patient. |  |  |  |  |  |  |  |

**Thank you for your valuable participation!**
